# Supplementary material
Source: publisher figshare collection journal article supplement (https://gsapubs.figshare.com/ndownloader/files/29040933)
Supplement: Supplementary file 1 [file 29040933]

## Sheet: Zircon Hf
	Table S2. Zircon Hf isotope of Yingen and Quagu plutons
	No.	Age (Ma)	176Yb/177Hf	2σ	176Lu/177Hf	2σ	176Hf/177Hf	2σ	176Hf/177Hfi	eHf(t)	TDM11 (Ma)	TDM12 (Ma)
	15AL33-4.2	253	0.0342086	0.000200247	0.00132476	4.90353e-06	0.282783	1.9876e-05	0.282777	5.74096	669.983	913.673
	15AL33-4.3	253	0.0218249	6.7137e-05	0.000774816	3.21337e-06	0.28282	1.63182e-05	0.282816	7.11344	609.346	825.974
	15AL33-4.4	252	0.0327033	0.000149372	0.00117677	4.25016e-06	0.28282	1.99917e-05	0.282814	7.03838	615.344	829.984
	15AL33-4.5	263	0.0330526	6.52488e-05	0.00120119	4.062e-06	0.282779	2.15976e-05	0.282773	5.81705	674.086	916.501
	15AL33-4.7	252	0.0114897	1.59038e-05	0.000438086	3.52972e-07	0.282788	2.04178e-05	0.282786	6.02333	648.3	894.92
	15AL33-4.10	253	0.01958	8.18663e-05	0.000786796	4.51224e-06	0.282724	1.98842e-05	0.28272	3.73216	743.83	1041.96
	15AL33-4.11	255	0.0241408	0.00026701	0.000875745	9.8054e-06	0.28283	2.06886e-05	0.282826	7.51676	595.926	801.71
	15AL33-4.14	253	0.0324586	0.000284451	0.00119865	1.01152e-05	0.282833	1.95808e-05	0.282827	7.52308	596.911	799.751
	15AL33-4.16	248	0.020407	5.86637e-05	0.000744395	1.88705e-06	0.282863	2.13777e-05	0.28286	8.55933	547.272	729.593
	15AL33-4.18	252	0.031012	0.00025719	0.00111956	7.92581e-06	0.2828	2.10075e-05	0.282795	6.35035	642.399	873.976
	15AL33-4.19	251	0.0349565	8.09353e-05	0.00124641	4.10857e-06	0.28285	2.00147e-05	0.282844	8.0583	574.072	763.961
	15AL33-4.20	252	0.0289548	0.000154492	0.0010637	4.70514e-06	0.282813	2.20455e-05	0.282808	6.80093	623.763	845.174
	15AL33-4.21	266	0.0279965	0.000215485	0.00100065	7.21061e-06	0.282864	2.04632e-05	0.282859	8.91179	550.623	720.903
	15AL33-4.23	252	0.0265695	0.000194877	0.00100771	2.5735e-06	0.28281	2.30698e-05	0.282805	6.70115	627.201	851.557
	15AL33-4.24	253	0.0270782	0.000100406	0.000982141	2.55205e-06	0.282872	2.23692e-05	0.282867	8.9326	538.506	709.539
	15AL33-11.1	272	0.0547215	0.00026084	0.00178183	7.19865e-06	0.282771	2.49922e-05	0.282762	5.63458	695.692	935.027
	15AL33-11.2	271	0.0366151	0.000257886	0.00122252	6.07885e-06	0.282815	2.9726e-05	0.282809	7.26015	623.109	830.424
	15AL33-11.3	269	0.0755563	0.000464556	0.00232656	8.60671e-06	0.282869	2.47231e-05	0.282857	8.9319	562.777	721.887
	15AL33-11.4	273	0.043943	0.000513808	0.00138299	1.55089e-05	0.282846	1.97362e-05	0.282838	8.35419	582.105	761.98
	15AL33-11.5	272	0.0796695	9.55617e-05	0.00248695	1.69346e-06	0.282861	2.28282e-05	0.282849	8.68864	576.784	739.765
	15AL33-11.6	271	0.0536315	7.26822e-05	0.001797	1.85556e-06	0.282811	2.76381e-05	0.282802	7.00729	638.951	846.56
	15AL33-11.7	271	0.0513706	0.000583321	0.00166741	1.60695e-05	0.282803	2.68354e-05	0.282795	6.76942	647.343	861.771
	15AL33-11.8	272	0.0382065	5.51086e-05	0.00126067	2.11643e-06	0.282802	2.4614e-05	0.282796	6.82948	641.671	858.724
	15AL33-11.9	271	0.0551686	0.000800124	0.00204246	2.94107e-05	0.282848	3.89067e-05	0.282837	8.26809	589.535	765.921
	15AL33-11.10	272	0.0394372	0.000113392	0.00123745	2.57818e-06	0.28277	2.16206e-05	0.282764	5.69943	686.902	930.924
	15AL33-11.11	272	0.0911046	0.000284902	0.00274883	8.42354e-06	0.282866	3.07225e-05	0.282852	8.82758	573.18	730.864
	15AL33-11.12	272	0.09193	0.000136639	0.00273829	3.831e-06	0.282815	2.47174e-05	0.282801	6.9994	649.808	847.782
	15AL33-11.13	271	0.0591883	8.90675e-05	0.0018112	2.33712e-06	0.282795	2.46483e-05	0.282786	6.45067	661.842	882.131
	15AL33-11.14	272	0.0980694	0.000756691	0.00285583	2.47024e-05	0.282887	2.78148e-05	0.282872	9.53573	544.24	685.528
	15AL33-11.15	271	0.0578675	0.000131814	0.00183203	3.42199e-06	0.282807	2.46449e-05	0.282798	6.87943	644.532	854.731
	15AL33-11.16	270	0.0471083	0.000320786	0.00149049	5.36977e-06	0.282818	2.05469e-05	0.28281	7.28774	623.685	827.877
	19AL01-6-01	274	0.024137	0.000837467	0.000761402	2.91938e-05	0.282782	2.07199e-05	0.282778	6.23121	662.267	898.522
	19AL01-6-02	272	0.0287391	0.000289342	0.000903214	5.84771e-06	0.282781	2.7216e-05	0.282777	6.15131	665.204	902.081
	19AL01-6-04	270	0.0356426	0.000798422	0.0011148	1.98042e-05	0.282761	2.33425e-05	0.282755	5.35098	697.799	951.648
	19AL01-6-05	271	0.0307927	0.000469016	0.000970439	1.29548e-05	0.282769	2.36405e-05	0.282764	5.68516	683.668	931.085
	19AL01-6-06	271	0.0260571	0.000331592	0.000796418	8.42479e-06	0.282781	1.7147e-05	0.282777	6.14489	663.491	901.73
	19AL01-6-09	271	0.0307686	0.000402658	0.000969436	9.26128e-06	0.282788	2.61649e-05	0.282783	6.35752	656.805	888.133
	19AL01-6-10	271	0.0209237	0.000198397	0.000654369	8.68444e-06	0.282774	1.85027e-05	0.282771	5.91381	671.172	916.501
	19AL01-6-11	271	0.0208692	0.000283431	0.000676607	1.07995e-05	0.282784	2.35023e-05	0.282781	6.27389	657.136	893.495
	19AL01-6-12	272	0.016629	0.000133791	0.000527935	3.22436e-06	0.282797	2.13549e-05	0.282794	6.76562	637.065	862.845
	19AL01-6-13	271	0.0399452	0.000331183	0.0012119	9.43867e-06	0.282821	2.12252e-05	0.282815	7.47236	614.47	816.855
	19AL01-6-16	270	0.0276561	0.00018897	0.000807278	6.15504e-06	0.282819	1.90835e-05	0.282815	7.44406	611.055	817.914
	19AL01-6-17	271	0.0214401	0.00045152	0.000679509	1.76508e-05	0.282805	2.49122e-05	0.282801	6.9938	628.621	847.481
	19AL01-6-18	271	0.0296869	0.000222357	0.000870408	5.18304e-06	0.282816	1.91303e-05	0.282812	7.36221	615.747	823.915
	19AL01-6-19	271	0.0252987	0.000747363	0.000805833	1.98029e-05	0.282784	2.28882e-05	0.28278	6.24174	659.737	895.541
	19AL01-6-20	272	0.0281387	0.000469104	0.000834244	1.5054e-05	0.282821	1.64509e-05	0.282817	7.56587	608.16	811.663
	19AL01-10-02	272	0.0221885	0.000332784	0.000666875	9.12441e-06	0.282811	1.70584e-05	0.282808	7.25263	619.096	831.702
	19AL01-10-03	287	0.0438349	0.00134877	0.00129541	4.19011e-05	0.282838	1.8609e-05	0.282831	8.40257	591.405	769.684
	19AL01-10-05	271	0.0343989	0.00151464	0.00101766	4.0908e-05	0.28281	1.90304e-05	0.282805	7.1155	626.975	839.683
	19AL01-10-06	271	0.0211618	0.000234802	0.00063174	6.85626e-06	0.282797	1.69251e-05	0.282794	6.72437	638.842	864.707
	19AL01-10-07	273	0.0304725	0.000601441	0.000917081	1.96849e-05	0.282814	1.81498e-05	0.282809	7.32449	619.394	827.865
	19AL01-10-08	271	0.0173113	0.000405126	0.000526276	1.19059e-05	0.282849	1.87503e-05	0.282846	8.59477	563.902	745.071
	19AL01-10-09	271	0.0191755	0.000115733	0.000578239	2.14759e-06	0.282815	1.74605e-05	0.282812	7.38022	612.38	822.778
	19AL01-10-10	271	0.0332319	0.000348194	0.00100221	1.29852e-05	0.282852	2.1317e-05	0.282847	8.61269	566.901	743.908
	19AL01-10-11	271	0.0158205	9.24624e-05	0.000489544	2.78924e-06	0.282835	1.55778e-05	0.282832	8.08422	583.787	777.747
	19AL01-10-12	272	0.0359658	0.000982629	0.00107683	3.12882e-05	0.282793	1.89848e-05	0.282788	6.53533	651.643	877.533
	19AL01-10-13	271	0.0486886	0.000206786	0.0014325	8.20598e-06	0.282874	1.71656e-05	0.282866	9.2952	542.679	700.2
	19AL01-10-14	272	0.023242	0.000404144	0.000694839	9.96378e-06	0.282798	1.86959e-05	0.282795	6.79252	637.609	861.117
	19AL01-10-15	272	0.0171921	0.00019608	0.000521914	4.06515e-06	0.282847	1.50028e-05	0.282844	8.53543	567.073	749.642
	19AL01-10-17	272	0.0219431	0.000143334	0.000660066	5.12961e-06	0.282897	1.93595e-05	0.282893	10.2721	499.186	638.41
	19AL01-10-19	272	0.037089	0.000666909	0.00109173	1.48735e-05	0.282841	1.80619e-05	0.282836	8.2338	583.674	768.924
	19AL01-2-1.1	267.198	0.0229592	0.000219058	0.000784872	5.20928e-06	0.282782	2.56634e-05	0.282779	6.10735	661.609	901.207
	19AL01-2-2.1	282.447	0.0217295	0.000987255	0.000663214	2.78829e-05	0.282824	1.63806e-05	0.28282	7.92591	601.321	796.69
	19AL01-2-3.1	259.296	0.0394749	0.000614782	0.0012877	1.37553e-05	0.282829	2.61372e-05	0.282822	7.48264	604.748	807.182
	19AL01-2-4.1	268.167	0.0191026	0.000327015	0.0006477	7.19981e-06	0.282843	3.14762e-05	0.28284	8.30144	574.047	761.657
	19AL01-2-5.1	261.481	0.0131343	5.94382e-05	0.000410377	5.36156e-07	0.2828	1.40488e-05	0.282798	6.67343	630.546	860.654
	19AL01-2-6.1	261.45	0.0219802	0.000733203	0.00066029	1.87517e-05	0.282837	1.75765e-05	0.282834	7.93482	582.933	779.94
	19AL01-2-7.1	264.379	0.0164619	0.000136782	0.000497987	3.41589e-06	0.282841	1.43864e-05	0.282838	8.16574	574.951	767.427
	19AL01-2-8.1	252.173	0.0136339	8.66119e-05	0.000431724	2.30581e-06	0.282839	1.55703e-05	0.282837	7.84154	576.718	778.771
	19AL01-2-9.1	261.324	0.0224675	0.000501931	0.000667175	1.30797e-05	0.282803	1.61978e-05	0.2828	6.73598	630.435	856.521
